# Supplementary material for: Predicting choice behaviour in economic games using gaze data encoded as scanpath images
Source: Springer Nature journal article supplement (doi:10.1038/s41598-023-31536-5), 2023-03-23
Supplement: 41598_2023_31536_MOESM1_ESM.pdf [file 41598_2023_31536_MOESM1_ESM.pdf]

## Supplementary material

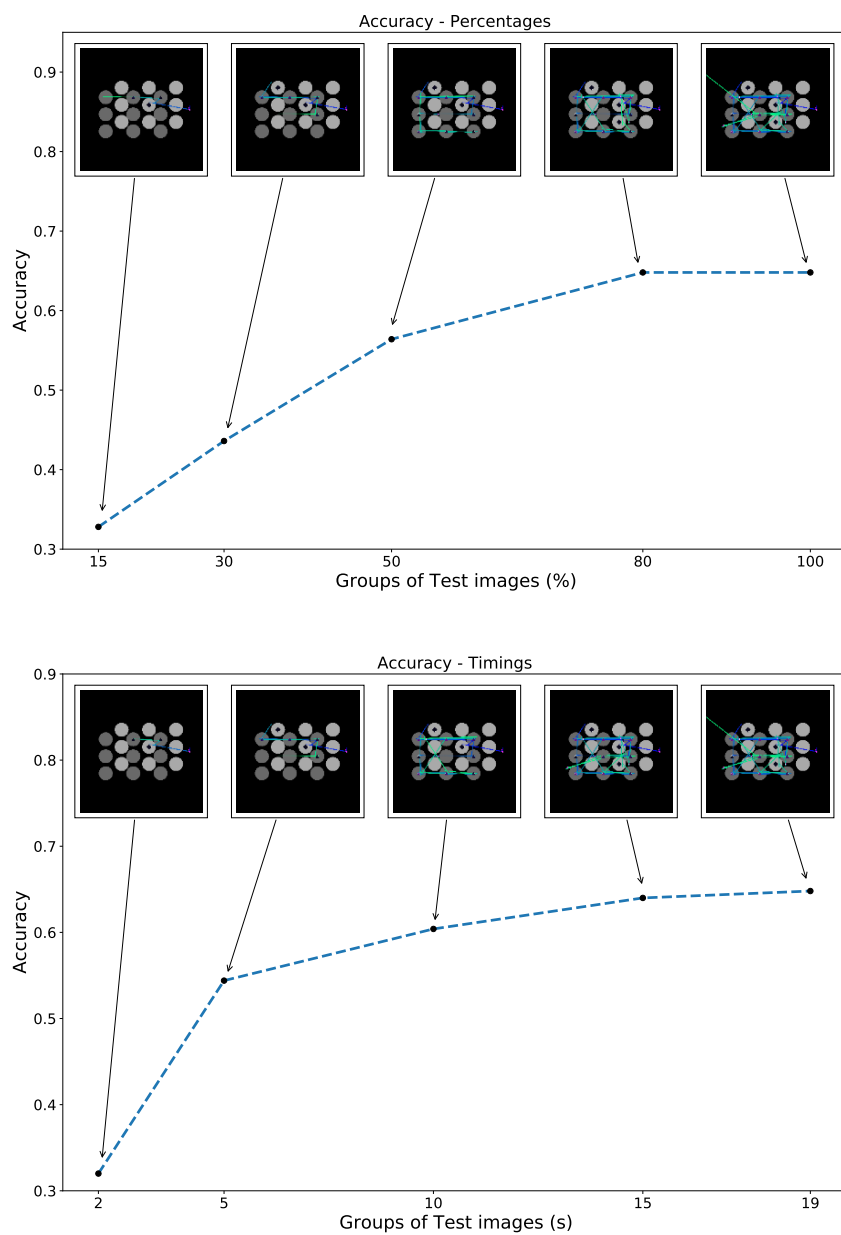

**Supplementary Figure 1.** Accuracy of VGG-19 model in CT 2 using subsequences via percentages (li) and time points (lii).

|        | Left | Middle | Right |
|--------|------|--------|-------|
| Up     | 49   | 67     | 75    |
| Middle | 27   | 21     | 38    |
| Bottom | 33   | 41     | 78    |

|        | Left | Middle | Right |
|--------|------|--------|-------|
| Up     | 68   | 47     | 76    |
| Middle | 40   | 33     | 84    |
| Bottom | 19   | 29     | 40    |

|        | Left | Middle | Right |
|--------|------|--------|-------|
| Up     | 79   | 36     | 29    |
| Middle | 77   | 71     | 52    |
| Bottom | 39   | 20     | 33    |

|        | Left | Middle | Right |
|--------|------|--------|-------|
| Up     | 21   | 42     | 33    |
| Middle | 37   | 83     | 27    |
| Bottom | 70   | 74     | 49    |

|        | Left | Middle | Right |
|--------|------|--------|-------|
| Up     | 43   | 30     | 84    |
| Middle | 41   | 28     | 21    |
| Bottom | 84   | 24     | 43    |

|        | Left | Middle | Right |
|--------|------|--------|-------|
| Up     | 39   | 62     | 78    |
| Middle | 76   | 38     | 61    |
| Bottom | 38   | 20     | 53    |

|        | Left | Middle | Right |
|--------|------|--------|-------|
| Up     | 79   | 34     | 56    |
| Middle | 40   | 17     | 52    |
| Bottom | 39   | 65     | 73    |

|        | Left | Middle | Right |
|--------|------|--------|-------|
| Up     | 79   | 39     | 59    |
| Middle | 47   | 37     | 19    |
| Bottom | 60   | 83     | 34    |

|        | Left | Middle | Right |
|--------|------|--------|-------|
| Up     | 43   | 74     | 62    |
| Middle | 82   | 57     | 37    |
| Bottom | 41   | 52     | 19    |

|        | Left | Middle | Right |
|--------|------|--------|-------|
| Up     | 74   | 40     | 65    |
| Middle | 64   | 78     | 36    |
| Bottom | 42   | 53     | 80    |

**Supplementary Figure 2.** The games used in the experiment grouped by types. The payoffs of the Row/Column player are located in the Bottom-left/Upper-right part of the nine cells. The Nash equilibrium payoffs is indicated in grey. The Naive strategy is underlined with a solid line and the Coordination strategy with a dashed line.

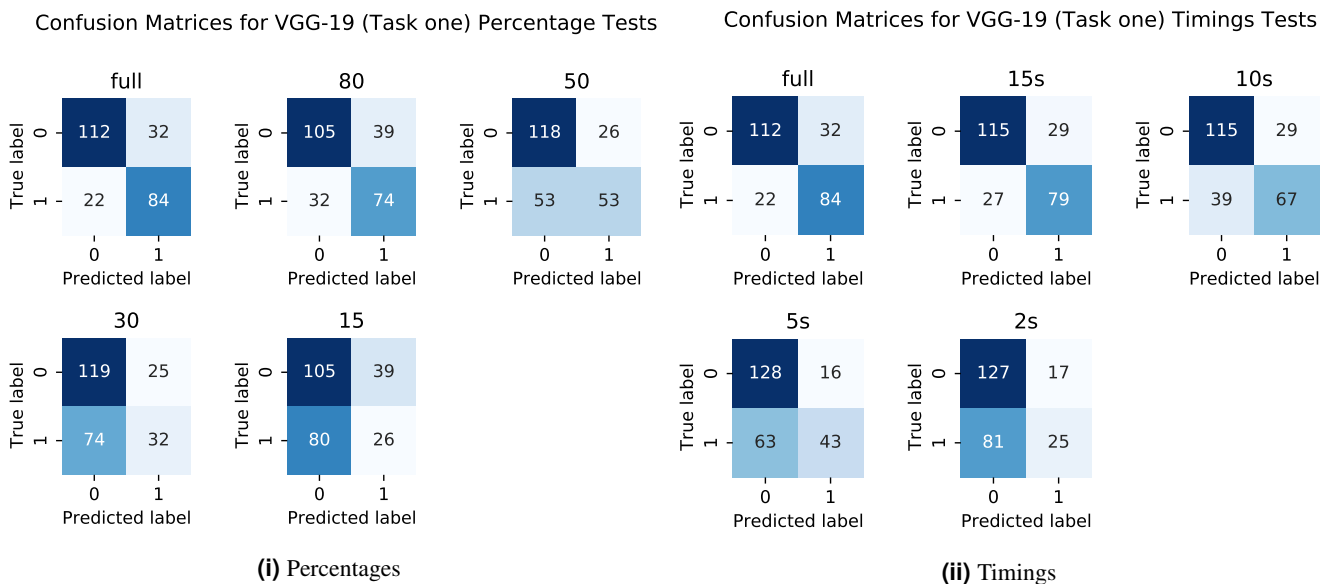

**Supplementary Figure 3.** Confusion Matrices of VGG19-model in CT 1 using subsequences via percentages (3i) and time points (3ii)

Confusion Matrices for SVM (Task one) Percentage Tests

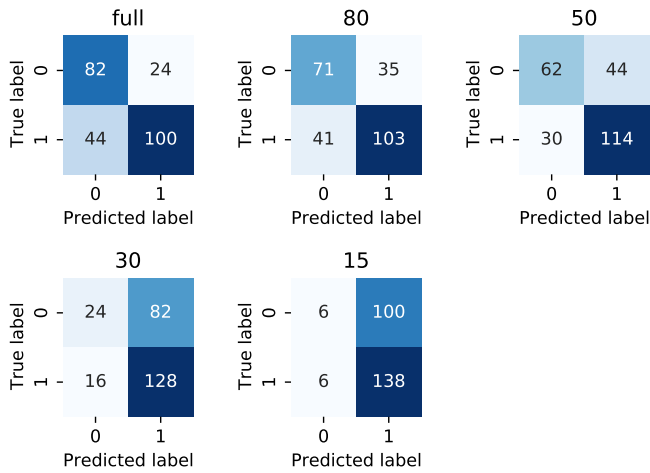

(i) Percentages

Confusion Matrices for SVM (Task one) Timings Tests

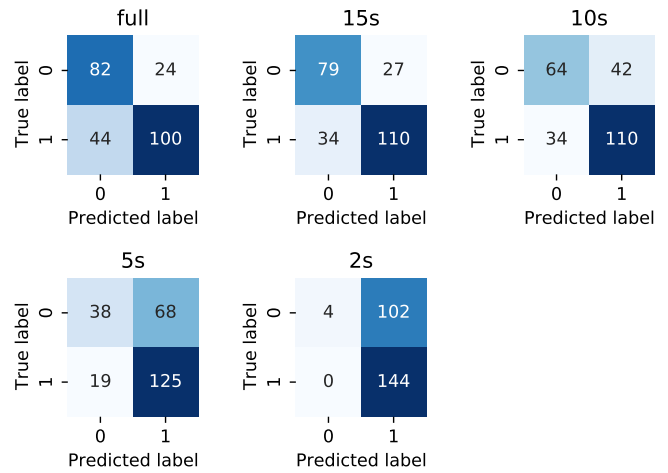

(ii) Timings

**Supplementary Figure 4.** Confusion Matrices of SVM-model in CT 1 using subsequences via percentages (4i) and time points (4ii)

Confusion Matrices for Logit (Task one) Percentage Tests

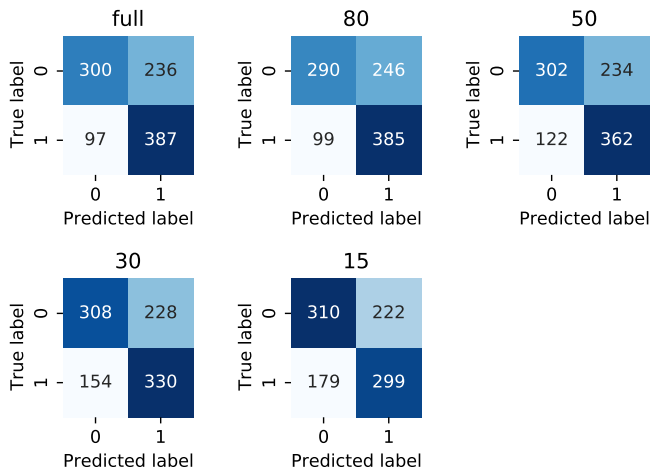

(i) Percentages

Confusion Matrices for Logit (Task one) Timings Tests

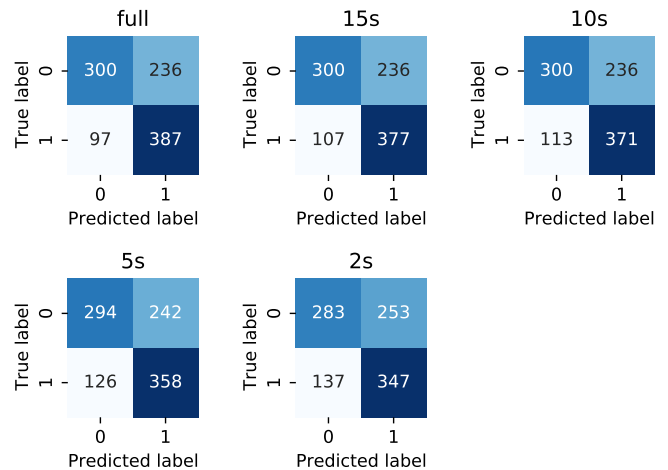

(ii) Timings

**Supplementary Figure 5.** Confusion Matrices of Logit regression model in CT 1 using subsequences via percentages (5i) and time points (5ii)

Confusion Matrices for VGG19 (Task two) Percentage Tests

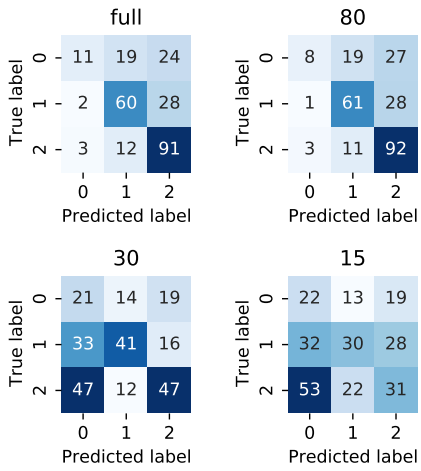

(i) Percentages

Confusion Matrices for VGG19 (Task two) Timings Tests

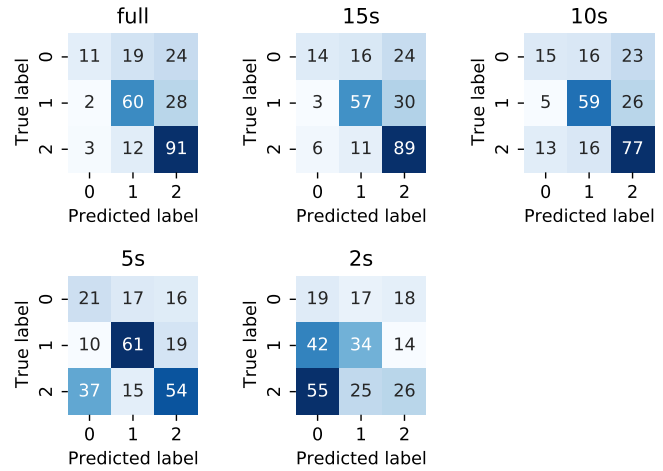

(ii) Timings

**Supplementary Figure 6.** Confusion Matrices of VGG19-model in CT 2 using subsequences via percentages (6i) and time points (6ii)

Confusion Matrices for SVM (Task two) Percentage Tests

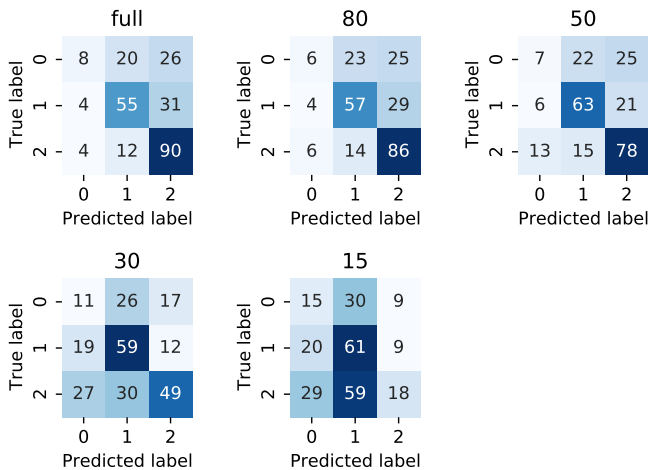

(i) Percentages

Confusion Matrices for SVM (Task two) Timings Tests

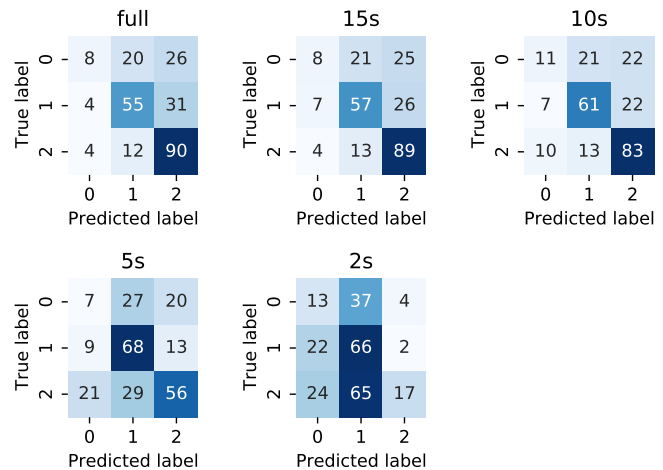

(ii) Timings

**Supplementary Figure 7.** Confusion Matrices of SVM-model in CT 2 using subsequences via percentages (7i) and time points (7ii)

Confusion Matrices for Multinomial Logit (Task two) Percentage Tests

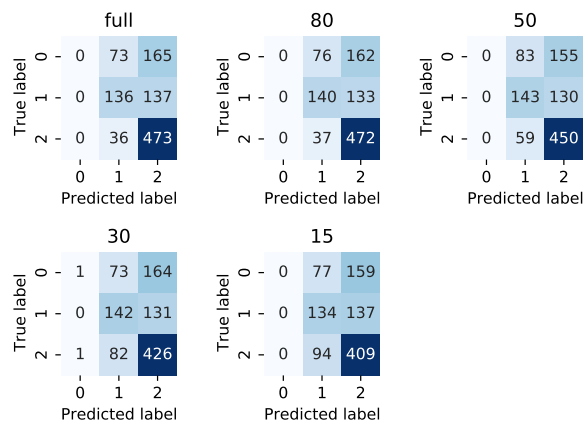

(i) Percentages

Confusion Matrices for Multinomial Logit (Task two) Timings Tests

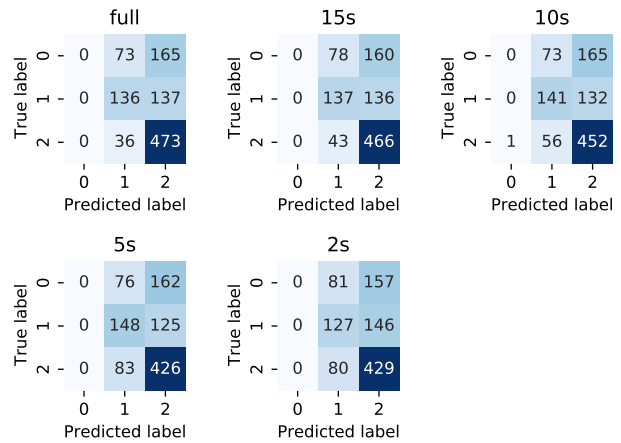

(ii) Timings

**Supplementary Figure 8.** Confusion Matrices of Multinomial Logit regression model in CT 2 using subsequences via percentages (8i) and time points (8ii)

| <b>Percentages</b> | Variable    | Estimate | Std. Error | z value | Pr(> z ) |
|--------------------|-------------|----------|------------|---------|----------|
| Full               | (Intercept) | 0.6289   | 0.2918     | 2.16    | 0.0312   |
|                    | Own         | -4.2517  | 0.5469     | -7.77   | 0.0000   |
|                    | Other       | 2.8274   | 0.5590     | 5.06    | 0.0000   |
|                    | Intracell   | -3.0616  | 1.4590     | -2.10   | 0.0359   |
| 80                 | (Intercept) | 0.6058   | 0.2737     | 2.21    | 0.0269   |
|                    | Own         | -4.1175  | 0.5168     | -7.97   | 0.0000   |
|                    | Other       | 2.1976   | 0.5102     | 4.31    | 0.0000   |
|                    | Intracell   | -2.1822  | 1.3381     | -1.63   | 0.1029   |
| 50                 | (Intercept) | 0.5141   | 0.2426     | 2.12    | 0.0340   |
|                    | Own         | -3.4802  | 0.4586     | -7.59   | 0.0000   |
|                    | Other       | 1.4195   | 0.4386     | 3.24    | 0.0012   |
|                    | Intracell   | -0.9786  | 1.1078     | -0.88   | 0.3770   |
| 30                 | (Intercept) | 0.3457   | 0.1958     | 1.77    | 0.0774   |
|                    | Own         | -2.5292  | 0.3724     | -6.79   | 0.0000   |
|                    | Other       | 1.3784   | 0.3724     | 3.70    | 0.0002   |
|                    | Intracell   | -1.2306  | 0.7986     | -1.54   | 0.1233   |
| 15                 | (Intercept) | 0.1362   | 0.1475     | 0.92    | 0.3557   |
|                    | Own         | -1.7372  | 0.2930     | -5.93   | 0.0000   |
|                    | Other       | 1.4423   | 0.3140     | 4.59    | 0.0000   |
|                    | Intracell   | -0.5133  | 0.4307     | -1.19   | 0.2334   |
| <b>Timings</b>     | Variable    | Estimate | Std. Error | z value | Pr(> z ) |
| Full               | (Intercept) | 0.6289   | 0.2918     | 2.16    | 0.0312   |
|                    | Own         | -4.2517  | 0.5469     | -7.77   | 0.0000   |
|                    | Other       | 2.8274   | 0.5590     | 5.06    | 0.0000   |
|                    | Intracell   | -3.0616  | 1.4590     | -2.10   | 0.0359   |
| 15s                | (Intercept) | 0.5912   | 0.2785     | 2.12    | 0.0338   |
|                    | Own         | -3.9147  | 0.5151     | -7.60   | 0.0000   |
|                    | Other       | 2.3470   | 0.5233     | 4.49    | 0.0000   |
|                    | Intracell   | -2.3422  | 1.3380     | -1.75   | 0.0800   |
| 10s                | (Intercept) | 0.6270   | 0.2614     | 2.40    | 0.0164   |
|                    | Own         | -3.8105  | 0.4868     | -7.83   | 0.0000   |
|                    | Other       | 1.8515   | 0.4853     | 3.81    | 0.0001   |
|                    | Intracell   | -1.7461  | 1.2094     | -1.44   | 0.1488   |
| 5s                 | (Intercept) | 0.6157   | 0.2363     | 2.61    | 0.0092   |
|                    | Own         | -3.3889  | 0.4371     | -7.75   | 0.0000   |
|                    | Other       | 1.1590   | 0.4334     | 2.67    | 0.0075   |
|                    | Intracell   | -0.7870  | 0.9360     | -0.84   | 0.4005   |
| 2s                 | (Intercept) | 0.4281   | 0.1781     | 2.40    | 0.0162   |
|                    | Own         | -2.5519  | 0.3409     | -7.48   | 0.0000   |
|                    | Other       | 0.6410   | 0.3451     | 1.86    | 0.0633   |
|                    | Intracell   | 0.2406   | 0.5172     | 0.47    | 0.6418   |

**Supplementary Table 1.** Logistic (*Logit*) Regression Estimates for Task 1.

| Percentages | Variable          | Estimate | Std. Error | Pr(> z ) | z value |
|-------------|-------------------|----------|------------|----------|---------|
| Full        | Intracell (Naive) | -3.01    | 1.92       | 0.12     | -1.57   |
|             | Other (Naive)     | -4.40    | 0.86       | 0.00     | -5.10   |
|             | Own (Naive)       | 1.28     | 0.66       | 0.05     | 1.94    |
|             | Intercept (Naive) | 0.68     | 0.39       | 0.08     | 1.72    |
|             | Intracell (NE)    | -3.07    | 1.65       | 0.06     | -1.86   |
|             | Other (NE)        | 1.18     | 0.67       | 0.08     | 1.77    |
|             | Own (NE)          | -2.97    | 0.64       | 0.00     | -4.64   |
|             | Intercept (NE)    | 1.51     | 0.35       | 0.00     | 4.35    |
| 80          | Intracell (Naive) | -1.39    | 1.79       | 0.44     | -0.78   |
|             | Other (Naive)     | -3.63    | 0.79       | 0.00     | -4.59   |
|             | Own (Naive)       | 1.47     | 0.62       | 0.02     | 2.37    |
|             | Intercept (Naive) | 0.45     | 0.37       | 0.22     | 1.22    |
|             | Intracell (NE)    | -1.75    | 1.56       | 0.26     | -1.12   |
|             | Other (NE)        | 0.95     | 0.61       | 0.12     | 1.56    |
|             | Own (NE)          | -2.81    | 0.61       | 0.00     | -4.60   |
|             | Intercept (NE)    | 1.40     | 0.33       | 0.00     | 4.26    |
| 50          | Intracell (Naive) | -0.96    | 1.53       | 0.53     | -0.63   |
|             | Other (Naive)     | -3.01    | 0.69       | 0.00     | -4.34   |
|             | Own (Naive)       | 1.29     | 0.56       | 0.02     | 2.29    |
|             | Intercept (Naive) | 0.41     | 0.33       | 0.22     | 1.23    |
|             | Intracell (NE)    | -0.96    | 1.35       | 0.48     | -0.71   |
|             | Other (NE)        | 0.45     | 0.53       | 0.39     | 0.86    |
|             | Own (NE)          | -2.43    | 0.55       | 0.00     | -4.39   |
|             | Intercept (NE)    | 1.37     | 0.30       | 0.00     | 4.61    |
| 30          | Intracell (Naive) | -1.60    | 1.08       | 0.14     | -1.48   |
|             | Other (Naive)     | -3.09    | 0.59       | 0.00     | -5.21   |
|             | Own (Naive)       | 0.48     | 0.46       | 0.29     | 1.05    |
|             | Intercept (Naive) | 0.73     | 0.27       | 0.01     | 2.70    |
|             | Intracell (NE)    | -1.83    | 0.97       | 0.06     | -1.89   |
|             | Other (NE)        | 0.09     | 0.45       | 0.85     | 0.19    |
|             | Own (NE)          | -2.09    | 0.46       | 0.00     | -4.55   |
|             | Intercept (NE)    | 1.48     | 0.25       | 0.00     | 5.96    |
| 15          | Intracell (Naive) | -0.57    | 0.61       | 0.35     | -0.94   |
|             | Other (Naive)     | -2.67    | 0.52       | 0.00     | -5.12   |
|             | Own (Naive)       | 0.42     | 0.37       | 0.27     | 1.11    |
|             | Intercept (Naive) | 0.63     | 0.21       | 0.00     | 2.95    |
|             | Intracell (NE)    | -0.56    | 0.54       | 0.30     | -1.03   |
|             | Other (NE)        | 0.28     | 0.38       | 0.47     | 0.72    |
|             | Own (NE)          | -1.47    | 0.37       | 0.00     | -3.95   |
|             | Intercept (NE)    | 1.25     | 0.19       | 0.00     | 6.47    |

**Supplementary Table 2.** Multinomial Regression Estimates for Task 2 (percentages).

| Timings | Variable          | Estimate | Std. Error | Pr(> z ) | z value |
|---------|-------------------|----------|------------|----------|---------|
| Full    | Intracell (Naive) | -3.01    | 1.92       | 0.12     | -1.57   |
|         | Other (Naive)     | -4.40    | 0.86       | 0.00     | -5.10   |
|         | Own (Naive)       | 1.28     | 0.66       | 0.05     | 1.94    |
|         | Intercept (Naive) | 0.68     | 0.39       | 0.08     | 1.72    |
|         | Intracell (NE)    | -3.07    | 1.65       | 0.06     | -1.86   |
|         | Other (NE)        | 1.18     | 0.67       | 0.08     | 1.77    |
|         | Own (NE)          | -2.97    | 0.64       | 0.00     | -4.64   |
|         | Intercept (NE)    | 1.51     | 0.35       | 0.00     | 4.35    |
| 15s     | Intracell (Naive) | -1.88    | 1.80       | 0.30     | -1.05   |
|         | Other (Naive)     | -3.53    | 0.80       | 0.00     | -4.39   |
|         | Own (Naive)       | 1.36     | 0.64       | 0.03     | 2.13    |
|         | Intercept (Naive) | 0.47     | 0.38       | 0.21     | 1.24    |
|         | Intracell (NE)    | -2.38    | 1.56       | 0.13     | -1.53   |
|         | Other (NE)        | 1.00     | 0.63       | 0.11     | 1.58    |
|         | Own (NE)          | -2.77    | 0.61       | 0.00     | -4.52   |
|         | Intercept (NE)    | 1.47     | 0.34       | 0.00     | 4.34    |
| 10s     | Intracell (Naive) | -1.55    | 1.68       | 0.35     | -0.93   |
|         | Other (Naive)     | -3.07    | 0.76       | 0.00     | -4.06   |
|         | Own (Naive)       | 1.39     | 0.62       | 0.02     | 2.26    |
|         | Intercept (Naive) | 0.38     | 0.37       | 0.30     | 1.04    |
|         | Intracell (NE)    | -1.81    | 1.44       | 0.21     | -1.25   |
|         | Other (NE)        | 0.67     | 0.59       | 0.25     | 1.14    |
|         | Own (NE)          | -2.70    | 0.59       | 0.00     | -4.61   |
|         | Intercept (NE)    | 1.49     | 0.32       | 0.00     | 4.64    |
| 5s      | Intracell (Naive) | -1.79    | 1.36       | 0.19     | -1.32   |
|         | Other (Naive)     | -2.95    | 0.69       | 0.00     | -4.29   |
|         | Own (Naive)       | 1.00     | 0.57       | 0.08     | 1.77    |
|         | Intercept (Naive) | 0.50     | 0.34       | 0.14     | 1.48    |
|         | Intracell (NE)    | -1.45    | 1.13       | 0.20     | -1.29   |
|         | Other (NE)        | -0.01    | 0.53       | 0.98     | -0.02   |
|         | Own (NE)          | -2.58    | 0.53       | 0.00     | -4.83   |
|         | Intercept (NE)    | 1.60     | 0.29       | 0.00     | 5.44    |
| 2s      | Intracell (Naive) | -1.73    | 0.80       | 0.03     | -2.18   |
|         | Other (Naive)     | -3.03    | 0.57       | 0.00     | -5.36   |
|         | Own (Naive)       | 0.18     | 0.44       | 0.68     | 0.41    |
|         | Intercept (Naive) | 0.85     | 0.26       | 0.00     | 3.25    |
|         | Intracell (NE)    | -0.36    | 0.66       | 0.58     | -0.55   |
|         | Other (NE)        | -0.55    | 0.43       | 0.20     | -1.29   |
|         | Own (NE)          | -2.30    | 0.43       | 0.00     | -5.35   |
|         | Intercept (NE)    | 1.60     | 0.23       | 0.00     | 6.86    |

**Supplementary Table 3.** Multinomial Regression Estimates for Task 2 (timings).

**Intra-individual consistency in decision strategies across games**

| Level of consistency   | 100% | 90% | 80% | 70% | Total |
|------------------------|------|-----|-----|-----|-------|
| Proportion of Subjects | 14%  | 11% | 13% | 14% | 51%   |
| Number of Subjects     | 34   | 26  | 31  | 33  | 124   |

**Supplementary Table 4.** Proportion and number of participants who use the same strategy 100%, 90%, 80% and 70% of the time over the course of the ten games.
